# Supplementary material for: Neotropical mammal diversity and the Great American Biotic Interchange: spatial and temporal variation in South America's fossil record
Source: Front Genet. 2015 Jan 5;5:451. doi: 10.3389/fgene.2014.00451 (PMC4283609; doi:10.3389/fgene.2014.00451)
Supplement: Supplementary file 2 [file Table2.XLSX]

## Sheet: Sheet1
Supplementary Table 2. Fisrt appearamce datum (FAD) of GABI participants in North and South America, data from the PBDB.
collection_no	collection.authorizer	order_name	family_name	occurrence.genus_name	occurrence.reference_no	collection.reference_no	collection_name	country	latdec	lngdec	paleolatdec	paleolngdec	period	epoch	ma_max	ma_min	ma_mid	Biome	Origin
18036	J. Alroy	Xenarthra	Megalonychidae	Megalonyx	6209	6209	Axtel	United States	35	-101.9	35.32	-100.23	Neogene		10.3	4.9	7.6	Temperate	South America
18560	J. Alroy	Xenarthra	Mylodontidae	Thinobadistes	3572	1919	McGehee Farm	United States	29.65	-82.6	29.9	-80.12	Neogene	Miocene	13.6	10.3	11.95	Temperate	South America
18560	J. Alroy	Xenarthra	Megalonychidae	Pliometanastes	1919	1919	McGehee Farm	United States	29.65	-82.6	29.9	-80.12	Neogene	Miocene	13.6	10.3	11.95	Temperate	South America
18738	J. Alroy	Xenarthra	Mylodontidae	Glossotherium	1175	1175	Rancho El Ocote (Medial)	Mexico	21.2	-100.7	21.51	-99.14	Neogene	Miocene	10.3	4.9	7.6	Tropical	South America
18746	J. Alroy	Xenarthra	Megalonychidae	Megalonyx	6213	1482	Tehuichila	Mexico	20.7	-98.7	21	-97.14	Neogene		10.3	4.9	7.6	Tropical	South America
19638	J. Alroy	Chiroptera	Molossidae	Eumops	1295	2040	McRae Wash	United States	32	-110.2	32.14	-109.6	Neogene	Pliocene	4.9	1.8	3.35	Temperate	South America
19650	J. Alroy	Rodentia	Erethizontidae	Erethizon	6294	1797	Wolf Ranch	United States	32	-110.2	32.14	-109.6	Neogene	Pliocene	4.9	1.8	3.35	Temperate	South America
19656	J. Alroy	Hicanodonta	Sclerocalyptidae	Glyptotherium	1584	1584	111 Ranch (Lower)	United States	33	-109.6	33.14	-108.99	Neogene	Pliocene	4.9	1.8	3.35	Temperate	South America
19747	J. Alroy	Xenarthra	Megatheriidae	Eremotherium	2615	2615	Brighton Canal	United States	27.3	-81.3	27.37	-80.68	Quaternary	Pleistocene	4.9	1.8	3.35	Temperate	South America
19749	J. Alroy	Xenarthra		Pachyarmatherium	1391	2621	El Jobean Pit	United States	26.9	-82	26.97	-81.38	Quaternary	Pleistocene	4.9	1.8	3.35	Temperate	South America
19752	J. Alroy	Xenarthra	Dasypodidae	Dasypus	3567	3567	Haile XVA	United States	29.8	-82.1	29.87	-81.47	Neogene	Pliocene	4.9	1.8	3.35	Temperate	South America
19752	J. Alroy	Xenarthra	Pampatheriidae	Holmesina	3567	3567	Haile XVA	United States	29.8	-82.1	29.87	-81.47	Neogene	Pliocene	4.9	1.8	3.35	Temperate	South America
19763	J. Alroy	Rodentia	Caviidae	Neochoerus	927	927	Sommer's Pit	United States	26.1	-81.5	26.17	-80.89			4.9	1.8	3.35	Temperate	South America
20077	J. Alroy	Rodentia	Caviidae	Neochoerus	1178	2594	Rancho Viejo	Mexico	21.0333	-100.75	21.15	-100.17			4.9	1.8	3.35	Tropical	South America
20117	J. Alroy	Xenarthra	Nothrotheriidae	Nothrotherium	1186	1186	Vallecito Creek (CU 49)	United States	32.9	-117.1	32.74	-116.14	Quaternary	Pleistocene	4.9	1.8	3.35	Temperate	South America
20152	J. Alroy	Xenarthra	Megalonychidae	Meizonyx	3576	3575	Barranca del Sisimico	El Salvador	13.7	-88.8	13.72	-88.7	Quaternary	Pleistocene	1.8	0.3	1.05	Tropical	South America
20152	J. Alroy	Notoungulata	Toxodontidae	Mixotoxodon	3575	3575	Barranca del Sisimico	El Salvador	13.7	-88.8	13.72	-88.7	Quaternary	Pleistocene	1.8	0.3	1.05	Tropical	South America
20322	J. Alroy	Xenarthra	Nothrotheriidae	Nothrotheriops	2499	2245	El Golfo de Santa Clara	Mexico	31.7	-114.5	31.55	-113.54			4.9	1.8	3.35	Temperate	South America
20322	J. Alroy	Xenarthra	Myrmecophagidae	Myrmecophaga	3105	2245	El Golfo de Santa Clara	Mexico	31.7	-114.5	31.55	-113.54			4.9	1.8	3.35	Temperate	South America
20384	J. Alroy	Chiroptera	Phyllostomidae	Desmodus	2611	3580	Inglis IA	United States	29	-82.68	29.07	-82.06			4.9	1.8	3.35	Temperate	South America
20384	J. Alroy	Xenarthra	Mylodontidae	Paramylodon	2499	3580	Inglis IA	United States	29	-82.68	29.07	-82.06			4.9	1.8	3.35	Temperate	South America
20495	J. Alroy	Rodentia	Caviidae	Hydrochoerus	19165	19165	Terapa	Mexico	29.6833	-109.65	29.68	-109.65	Quaternary	Pleistocene	0.3	0.012	0.156	Temperate	South America
20495	J. Alroy	Xenarthra	Pampatheriidae	Pampatherium	28655	19165	Terapa	Mexico	29.6833	-109.65	29.68	-109.65	Quaternary	Pleistocene	0.3	0.012	0.156	Temperate	South America
70114	J. Alroy	Hicanodonta	Sclerocalyptidae	Glyptotherium	23536	23536	Arroyo El Tanque (17 m)	Mexico	21.1	-100.8	21.22	-100.22			4.9	1.8	3.35	Tropical	South America
70114	J. Alroy	Xenarthra	Pampatheriidae	Vassallia	23536	23536	Arroyo El Tanque (17 m)	Mexico	21.1	-100.8	21.22	-100.22			4.9	1.8	3.35	Tropical	South America
71264	J. Alroy	Didelphimorphia	Didelphidae	Marmosa	24062	24062	Cueva de Abra Travertine	Mexico	22.4	-98	22.4	-98	Quaternary	Pleistocene	0.126	0.0117	0.06885	Tropical	South America
71264	J. Alroy	Chiroptera	Phyllostomidae	Artibeus	24062	24062	Cueva de Abra Travertine	Mexico	22.4	-98	22.4	-98	Quaternary	Pleistocene	0.126	0.0117	0.06885	Tropical	South America
71278	J. Alroy	Xenarthra	Glyptodontidae	Glyptodon	24004	24004	El Hatillo	Panama	7.91667	-80.6333	7.92	-80.63	Quaternary	Pleistocene	0.126	0.0117	0.06885	Tropical	South America
71278	J. Alroy	Xenarthra	Glyptodontidae	Lomaphorus	24004	24004	El Hatillo	Panama	7.91667	-80.6333	7.92	-80.63	Quaternary	Pleistocene	0.126	0.0117	0.06885	Tropical	South America
71278	J. Alroy	Xenarthra	Mylodontidae	Scelidotherium	24004	24004	El Hatillo	Panama	7.91667	-80.6333	7.92	-80.63	Quaternary	Pleistocene	0.126	0.0117	0.06885	Tropical	South America
71294	J. Alroy	Notoungulata	Toxodontidae	Toxodon	23961	23961	Ciudad Real	Guatemala	14.45	-90.5667	14.45	-90.57	Quaternary	Pleistocene	0.126	0.0117	0.06885	Tropical	South America
71312	J. Alroy	Xenarthra	Megatheriidae	Megatherium	23972	23972	Rio de la Pasion	Guatemala	16.25	-90.0333	16.25	-90.03	Quaternary	Pleistocene	0.126	0.0117	0.06885	Tropical	South America
71312	J. Alroy	Xenarthra	Mylodontidae	Mylodon	23972	23972	Rio de la Pasion	Guatemala	16.25	-90.0333	16.25	-90.03	Quaternary	Pleistocene	0.126	0.0117	0.06885	Tropical	South America
104046	M. Uhen	Xenarthra	Mylodontidae	Mylodon	15425	15425	Allen's Farm	United States	29.2075	-81.0033	29.21	-81	Quaternary	Pleistocene	0.126	0.0117	0.06885	Temperate	South America
13503	J. Alroy	Carnivora	Procyonidae	Parahyaenodon	47205	6117	Monte Hermoso	Argentina	-38	-61	-38.09	-59.57	Neogene		6.8	4	5.4	Temperate	North America
13907	J. Alroy	Carnivora	Felidae	Leopardus	6166	6166	15 km N Mar del Plata	Argentina	-38	-57.55	-38.03	-56.98			3	1.2	2.1	Temperate	North America
36611	J. Alroy	Artiodactyla	Camelidae	Palaeolama	9817	9817	900 m SW of Punta Hermengo (lower)	Argentina	-38.2667	-57.85	-38.28	-57.56	Quaternary	Pleistocene	1.2	0.781	0.9905	Temperate	North America
55600	M. Uhen	Carnivora	Procyonidae	Cyonasua	15016	15016	Parana, Pueblo Brugo to Diamante, Ituzaingo Fm.	Argentina	-33.7167	-59.25	-33.83	-57.06	Neogene	Miocene	9	6.8	7.9	Temperate	North America
63335	D. Croft	Rodentia	Cricetidae	Reithrodon	17632	17632	Bajo San Jos? Lower Section, Buenos Aires, Argentina	Argentina	-38.5	-61.7667	-38.5	-61.77	Quaternary	Pleistocene	0.781	0.126	0.4535	Temperate	North America
63335	D. Croft	Artiodactyla	Tayassuidae	Tayassu	17632	17632	Bajo San Jos? Lower Section, Buenos Aires, Argentina	Argentina	-38.5	-61.7667	-38.5	-61.77	Quaternary	Pleistocene	0.781	0.126	0.4535	Temperate	North America
63335	D. Croft	Rodentia	Cricetidae	Lundomys	17632	17632	Bajo San Jos? Lower Section, Buenos Aires, Argentina	Argentina	-38.5	-61.7667	-38.5	-61.77	Quaternary	Pleistocene	0.781	0.126	0.4535	Temperate	North America
63335	D. Croft	Rodentia	Cricetidae	Akodon	17632	17632	Bajo San Jos? Lower Section, Buenos Aires, Argentina	Argentina	-38.5	-61.7667	-38.5	-61.77	Quaternary	Pleistocene	0.781	0.126	0.4535	Temperate	North America
63335	D. Croft	Carnivora	Felidae	Herpailurus	17632	17632	Bajo San Jos? Lower Section, Buenos Aires, Argentina	Argentina	-38.5	-61.7667	-38.5	-61.77	Quaternary	Pleistocene	0.781	0.126	0.4535	Temperate	North America
63515	C. Bell	Chiroptera	Vespertilionidae	Eptesicus	18256	18256	Mene de Inciarte Tar Seep	Venezuela	10.7947	-72.2392	10.79	-72.24	Quaternary	Pleistocene	0.126	0.0117	0.06885	Tropical	North America
63515	C. Bell	Artiodactyla	Cervidae	Mazama	26437	18256	Mene de Inciarte Tar Seep	Venezuela	10.7947	-72.2392	10.79	-72.24	Quaternary	Pleistocene	0.126	0.0117	0.06885	Tropical	North America
63515	C. Bell	Chiroptera	Vespertilionidae	Rhogeessa	18256	18256	Mene de Inciarte Tar Seep	Venezuela	10.7947	-72.2392	10.79	-72.24	Quaternary	Pleistocene	0.126	0.0117	0.06885	Tropical	North America
63515	C. Bell	Rodentia	Cricetidae	Sigmodon	31501	18256	Mene de Inciarte Tar Seep	Venezuela	10.7947	-72.2392	10.79	-72.24	Quaternary	Pleistocene	0.126	0.0117	0.06885	Tropical	North America
63515	C. Bell	Rodentia	Muridae	Heteromys	31501	18256	Mene de Inciarte Tar Seep	Venezuela	10.7947	-72.2392	10.79	-72.24	Quaternary	Pleistocene	0.126	0.0117	0.06885	Tropical	North America
70673	D. Croft	Rodentia	Cricetidae	Calomys	19694	19694	Tarija	Bolivia	-21.5333	-64.7333	-21.59	-64.25	Quaternary	Pleistocene	2.588	0.781	1.6845	Tropical	North America
70673	D. Croft	Rodentia	Cricetidae	Oxymycterus	19694	19694	Tarija	Bolivia	-21.5333	-64.7333	-21.59	-64.25	Quaternary	Pleistocene	2.588	0.781	1.6845	Tropical	North America
70673	D. Croft	Carnivora	Canidae	Chrysocyon	19694	19694	Tarija	Bolivia	-21.5333	-64.7333	-21.59	-64.25	Quaternary	Pleistocene	2.588	0.781	1.6845	Tropical	North America
70673	D. Croft	Carnivora	Ursidae	Arctodus	19694	19694	Tarija	Bolivia	-21.5333	-64.7333	-21.59	-64.25	Quaternary	Pleistocene	2.588	0.781	1.6845	Tropical	North America
70673	D. Croft	Rodentia	Cricetidae	Andinomys	19694	19694	Tarija	Bolivia	-21.5333	-64.7333	-21.59	-64.25	Quaternary	Pleistocene	2.588	0.781	1.6845	Tropical	North America
70673	D. Croft	Rodentia	Cricetidae	Nectomys	19694	19694	Tarija	Bolivia	-21.5333	-64.7333	-21.59	-64.25	Quaternary	Pleistocene	2.588	0.781	1.6845	Tropical	North America
70673	D. Croft	Proboscidea	Gomphotheriidae	Haplomastodon	19694	19694	Tarija	Bolivia	-21.5333	-64.7333	-21.59	-64.25	Quaternary	Pleistocene	2.588	0.781	1.6845	Tropical	North America
70673	D. Croft	Carnivora	Canidae	Theriodictis	19694	19694	Tarija	Bolivia	-21.5333	-64.7333	-21.59	-64.25	Quaternary	Pleistocene	2.588	0.781	1.6845	Tropical	North America
70673	D. Croft	Carnivora	Procyonidae	Nasua	19694	19694	Tarija	Bolivia	-21.5333	-64.7333	-21.59	-64.25	Quaternary	Pleistocene	2.588	0.781	1.6845	Tropical	North America
70673	D. Croft	Rodentia	Cricetidae	Kunsia	19694	19694	Tarija	Bolivia	-21.5333	-64.7333	-21.59	-64.25	Quaternary	Pleistocene	2.588	0.781	1.6845	Tropical	North America
70673	D. Croft	Proboscidea	Gomphotheriidae	Notiomastodon	19694	19694	Tarija	Bolivia	-21.5333	-64.7333	-21.59	-64.25	Quaternary	Pleistocene	2.588	0.781	1.6845	Tropical	North America
70673	D. Croft	Rodentia	Cricetidae	Phyllotis	19694	19694	Tarija	Bolivia	-21.5333	-64.7333	-21.59	-64.25	Quaternary	Pleistocene	2.588	0.781	1.6845	Tropical	North America
70673	D. Croft	Proboscidea	Gomphotheriidae	Cuvieronius	19636	19694	Tarija	Bolivia	-21.5333	-64.7333	-21.59	-64.25	Quaternary	Pleistocene	2.588	0.781	1.6845	Tropical	North America
70673	D. Croft	Artiodactyla	Cervidae	Charitoceros	19694	19694	Tarija	Bolivia	-21.5333	-64.7333	-21.59	-64.25	Quaternary	Pleistocene	2.588	0.781	1.6845	Tropical	North America
70673	D. Croft	Carnivora	Felidae	Puma	19694	19694	Tarija	Bolivia	-21.5333	-64.7333	-21.59	-64.25	Quaternary	Pleistocene	2.588	0.781	1.6845	Tropical	North America
70704	D. Croft	Carnivora	Felidae	Panthera	19694	19694	Nuapua 1, Chuquisaca, Bolivia	Bolivia	-20.75	-63.0667	-20.75	-63.07	Quaternary	Pleistocene	0.781	0.126	0.4535	Tropical	North America
71265	J. Alroy	Artiodactyla	Cervidae	Antifer	23979	23979			-33.2127	-65.3429	-31.93	-71.51	Quaternary	Pleistocene	0.126	0.0117	0.06885	Temperate	North America
71274	J. Alroy	Artiodactyla	Cervidae	Morenelaphus	24014	24014	Pintado	Uruguay	-30.4333	-56.45	-30.43	-56.45	Quaternary	Pleistocene	0.781	0.012	0.3965	Temperate	North America
71274	J. Alroy	Artiodactyla	Cervidae	Ozotoceros	24014	24014	Pintado	Uruguay	-30.4333	-56.45	-30.43	-56.45	Quaternary	Pleistocene	0.781	0.012	0.3965	Temperate	North America
71285	J. Alroy	Lagomorpha	Leporidae	Sylvilagus	24107	24107	Los Hoyos	Colombia	3.8	-74.3	3.8	-74.3	Quaternary	Pleistocene	0.781	0.012	0.3965	Tropical	North America
71289	J. Alroy	Artiodactyla	Cervidae	Blastocerus	24007	24007	Arroyo Toropi-Level 1	Argentina	-27.8	-58.3	-27.81	-58.04	Quaternary	Pleistocene	0.781	0.012	0.3965	Temperate	North America
71291	J. Alroy		Soricidae	Cryptotis	24108	24108	Curiti	Colombia	7.1	-73.2	7.1	-73.2	Quaternary	Pleistocene	0.781	0.012	0.3965	Tropical	North America
71302	J. Alroy	Carnivora	Canidae	Speothos	24084	24084	Joao Cativo-Site 2	Brazil	-3.5	-39.5833	-3.48	-39.37	Quaternary	Pleistocene	2.588	0.0117	1.29985	Tropical	North America
71303	J. Alroy	Carnivora	Mustelidae	Lontra	24010	24010	Lujan	Argentina	-34.0667	-57.125	-34.07	-57.12	Quaternary	Pleistocene	0.781	0.012	0.3965	Temperate	North America
71303	J. Alroy	Carnivora	Mustelidae	Lyncodon	24010	24010	Lujan	Argentina	-34.0667	-57.125	-34.07	-57.12	Quaternary	Pleistocene	0.781	0.012	0.3965	Temperate	North America
71303	J. Alroy	Artiodactyla	Camelidae	Eulamaops	24010	24010	Lujan	Argentina	-34.0667	-57.125	-34.07	-57.12	Quaternary	Pleistocene	0.781	0.012	0.3965	Temperate	North America
71303	J. Alroy	Carnivora	Canidae	Dusicyon	24010	24010	Lujan	Argentina	-34.0667	-57.125	-34.07	-57.12	Quaternary	Pleistocene	0.781	0.012	0.3965	Temperate	North America
71304	J. Alroy	Carnivora	Mustelidae	Galictis	24008	24008	Arroyo Loberia	Argentina	-38.0333	-57.7167	-38.05	-57.43	Quaternary	Pleistocene	2.588	0.0117	1.29985	Temperate	North America
71322	J. Alroy	Proboscidea	Gomphotheriidae	Stegomastodon	23916	23916	Nuapua 1	Bolivia	-20.8667	-63.0667	-20.89	-62.82	Quaternary	Pleistocene	1.2	0.781	0.9905	Tropical	North America
71330	J. Alroy	Rodentia	Muridae	Colomys	24113	24113	Santa Clara del Mar	Argentina	-37.75	-57.4167	-37.75	-57.42	Quaternary	Pleistocene	0.126	0.0117	0.06885	Tropical	North America
71334	J. Alroy	Lagomorpha	Leporidae	Kerodon	23910	23910	Toca da Cima dos Pilao	Brazil	-9.01667	-42.7	-9.02	-42.7	Quaternary	Pleistocene	0.126	0.0117	0.06885	Temperate	North America
71347	J. Alroy	Artiodactyla	Camelidae	Vicugna	23974	23974	Centinela del Mar	Argentina	-36	-58	-36	-58	Quaternary	Pleistocene	0.781	0.012	0.3965	Temperate	North America
92299	M. Uhen	Carnivora	Mustelidae	Pteronura	31109	31109	South Bank of Ensenada Creek	Argentina	-32.1286	-60.4367	-32.13	-60.44	Quaternary	Pleistocene	0.126	0.0117	0.06885	Tropical	North America
133630	C. Jaramillo	Carnivora	Canidae	Dusicyon	43044	43044	La Carolina	Ecuador	-2.224	-80.925	-2.22	-80.92	Quaternary	Pleistocene	0.781	0.0117	0.39635	Tropical	North America
133633	C. Jaramillo	Artiodactyla	Cervidae	Agalmaceros	43044	43044	Quebrada de Ot?n	Ecuador	-0.88	-78.398	0.33	-77.96	Quaternary	Pleistocene	2.588	0.0117	1.29985	Tropical	North America
136521	C. Jaramillo	Carnivora	Mustelidae	Pteronura	43673	43673	Gruta do Curupira	Brazil	-15.2228	-56.7528	-15.22	-56.75	Quaternary	Pleistocene	0.126	0.0117	0.06885	Tropical	North America
137876	C. Jaramillo	Artiodactyla	Tayassuidae	Sylvochoerus	44103	44103			-9.76	-72.7656	-9.14	-71.02	Neogene	Miocene	11.608	5.333	8.4705	Tropical	North America
137877	C. Jaramillo	Artiodactyla	Tayassuidae	Waldochoerus	44103	44103	VF2	Peru	-10.95	-72.6833	-11.26	-70.91	Neogene	Miocene	11.608	5.333	8.4705	Tropical	North America
140653	C. Jaramillo	Artiodactyla	Cervidae	Epieurycerus	45580	45580	La Plata (Ensenada)	Argentina	-34.8833	-57.9333	-34.88	-57.93	Quaternary	Pleistocene	0.781	0.126	0.4535	Temperate	North America
140934	C. Jaramillo	Rodentia	Cricetidae	Eligmodontia	45758	23867	Quequ?n Salado - Indio Rico	Argentina	-38.7483	-60.6033	-38.75	-60.6	Quaternary	Pleistocene	0.781	0.012	0.3965	Temperate	North America
141182	C. Jaramillo	Rodentia	Cricetidae	Oligoryzomys	45821	45827	La Angostura	Argentina	-26.925	-65.6972	-26.93	-65.7	Quaternary	Pleistocene	0.0276	0.01758	0.02259	Temperate	North America
141182	C. Jaramillo	Rodentia	Cricetidae	Neotomys	45821	45827	La Angostura	Argentina	-26.925	-65.6972	-26.93	-65.7	Quaternary	Pleistocene	0.0276	0.01758	0.02259	Temperate	North America
141182	C. Jaramillo	Rodentia	Cricetidae	Tafimys	45821	45827	La Angostura	Argentina	-26.925	-65.6972	-26.93	-65.7	Quaternary	Pleistocene	0.0276	0.01758	0.02259	Temperate	North America
141182	C. Jaramillo	Rodentia	Cricetidae	Abrothrix	45821	45827	La Angostura	Argentina	-26.925	-65.6972	-26.93	-65.7	Quaternary	Pleistocene	0.0276	0.01758	0.02259	Temperate	North America
141896	C. Jaramillo	Perissodactyla	Equidae	Hippidion	46088	46088	Esquina Blanca - Middle Unit	Argentina	-23.3333	-65.3333	-23.41	-64.59			3	1.2	2.1	Temperate	North America
141896	C. Jaramillo	Artiodactyla	Tayassuidae	Platygonus	46088	46088	Esquina Blanca - Middle Unit	Argentina	-23.3333	-65.3333	-23.41	-64.59			3	1.2	2.1	Temperate	North America
142016	C. Jaramillo	Carnivora	Ursidae	Arctotherium	46109	46109	Tarija-1	Bolivia	-21.5	-64.75	-21.55	-64.26	Quaternary	Pleistocene	1.2	0.781	0.9905	Tropical	North America
142016	C. Jaramillo	Perissodactyla	Tapiridae	Tapirus	46109	46109	Tarija-1	Bolivia	-21.5	-64.75	-21.55	-64.26	Quaternary	Pleistocene	1.2	0.781	0.9905	Tropical	North America
142016	C. Jaramillo	Carnivora	Mustelidae	Conepatus	46109	46109	Tarija-1	Bolivia	-21.5	-64.75	-21.55	-64.26	Quaternary	Pleistocene	1.2	0.781	0.9905	Tropical	North America
142016	C. Jaramillo	Perissodactyla	Equidae	Equus	46109	46109	Tarija-1	Bolivia	-21.5	-64.75	-21.55	-64.26	Quaternary	Pleistocene	1.2	0.781	0.9905	Tropical	North America
142016	C. Jaramillo	Artiodactyla	Camelidae	Palaeolama	46109	46109	Tarija-1	Bolivia	-21.5	-64.75	-21.55	-64.26	Quaternary	Pleistocene	1.2	0.781	0.9905	Tropical	North America
142016	C. Jaramillo	Artiodactyla	Camelidae	Lama	46109	46109	Tarija-1	Bolivia	-21.5	-64.75	-21.55	-64.26	Quaternary	Pleistocene	1.2	0.781	0.9905	Tropical	North America
142016	C. Jaramillo	Carnivora	Canidae	Canis	46109	46109	Tarija-1	Bolivia	-21.5	-64.75	-21.55	-64.26	Quaternary	Pleistocene	1.2	0.781	0.9905	Tropical	North America
142016	C. Jaramillo	Carnivora	Felidae	Smilodon	46109	46109	Tarija-1	Bolivia	-21.5	-64.75	-21.55	-64.26	Quaternary	Pleistocene	1.2	0.781	0.9905	Tropical	North America
142016	C. Jaramillo	Perissodactyla	Equidae	Onohippidium	46109	46109	Tarija-1	Bolivia	-21.5	-64.75	-21.55	-64.26	Quaternary	Pleistocene	1.2	0.781	0.9905	Tropical	North America
142016	C. Jaramillo	Artiodactyla	Tayassuidae	Dicotyles	46109	46109	Tarija-1	Bolivia	-21.5	-64.75	-21.55	-64.26	Quaternary	Pleistocene	1.2	0.781	0.9905	Tropical	North America
142016	C. Jaramillo	Artiodactyla	Camelidae	Hemiauchenia	NA	46109	Tarija-1	Bolivia	-21.5	-64.75	-21.55	-64.26	Quaternary	Pleistocene	1.2	0.781	0.9905	Tropical	North America
142016	C. Jaramillo	Carnivora	Canidae	Protocyon	46109	46109	Tarija-1	Bolivia	-21.5	-64.75	-21.55	-64.26	Quaternary	Pleistocene	1.2	0.781	0.9905	Tropical	North America
142016	C. Jaramillo	Carnivora	Felidae	Felis	46109	46109	Tarija-1	Bolivia	-21.5	-64.75	-21.55	-64.26	Quaternary	Pleistocene	1.2	0.781	0.9905	Tropical	North America
142338	C. Jaramillo	Rodentia	Cricetidae	Holochilus	46210	46210	Tarija-2	Bolivia	-21.5	-64.75	-21.55	-64.26	Quaternary	Pleistocene	2.588	0.781	1.6845	Tropical	North America
142544	C. Jaramillo	Artiodactyla	Tayassuidae	Catagonus	46285	46285	Tarija-3	Bolivia	-21.55	-64.7667	-21.58	-64.52	Quaternary	Pleistocene	1.2	0.781	0.9905	Tropical	North America
143054	C. Jaramillo	Artiodactyla	Cervidae	Hippocamelus	46381	46381	Pueblo Viejo (Tarija)	Bolivia	-21.45	-64.7833	-21.48	-64.54	Quaternary	Pleistocene	1.2	0.781	0.9905	Tropical	North America
144515	C. Jaramillo	Proboscidea	Gomphotheriidae	Amahuacatherium	46734	46734	Aurinsa	Peru	-12.5739	-70.1069	-12.9	-67.85	Neogene	Miocene	10	9	9.5	Tropical	North America
144977	C. Jaramillo	Carnivora	Felidae	Homotherium	46869	46869	El Breal de Orocual	Venezuela	9.84667	-63.3294	9.82	-63.15	Quaternary	Pleistocene	1	0.5	0.75	Tropical	North America
145366	C. Jaramillo	Carnivora	Canidae	Urocyon	46993	46993	Inciarte asphalt pit	Venezuela	10.795	-72.2392	10.79	-72.24	Quaternary	Pleistocene	0.126	0.0117	0.06885	Tropical	North America
145505	C. Jaramillo	Artiodactyla	Cervidae	Odocoileus	46859	46859	Cupisnique Desert (including Pampa de los F?siles and Piedra Escrita sites	Peru	-7.5	-79.5	-7.5	-79.5	Quaternary	Pleistocene	0.025	0.015	0.02	Tropical	North America
147999	C. Jaramillo	Carnivora	Felidae	Smilodon	47573	47573	Mar del Plata (Ensenadan)	Argentina	-37.9842	-57.5894	-38	-57.3	Quaternary	Pleistocene	1.2	0.781	0.9905	Temperate	North America
152062	C. Jaramillo	Rodentia	Cricetidae	Necromys	48757	48757	Farola (FL1)	Argentina	-38.9669	-61.6953	-39.06	-60.26	Neogene		6.8	4	5.4	Temperate	North America
152062	C. Jaramillo	Rodentia	Cricetidae	Auliscomys	48757	48757	Farola (FL1)	Argentina	-38.9669	-61.6953	-39.06	-60.26	Neogene		6.8	4	5.4	Temperate	North America
153674	C. Jaramillo	Rodentia	Cricetidae	Scapteromys	49750	49750	Las Brusquitas - Vorohue	Argentina	-38.225	-57.7417	-38.28	-56.6	Neogene	Pliocene	4	3	3.5	Temperate	North America
156532	C. Jaramillo	Artiodactyla	Palaeomerycidae	Surameryx	51301	51301	LACM 5159	Brazil	-10.9333	-69.5667	-11.2	-67.79	Neogene	Miocene	11.608	5.333	8.4705	Tropical	North America
